# Supplementary material for: c-Met+ Cytotoxic T Lymphocytes Exhibit Enhanced Cytotoxicity in Mice and Humans In Vitro Tumor Models
Source: MDPI journal article supplement (doi:10.3390/biomedicines11123123), 2023-11-23
Supplement: s1 [file s1]

**Table S1: Antibodies for flow cytometry**

| Antibodies   | Species reactivity | Clone                | Fluorochrome | Supplier     | RRID number |
|--------------|--------------------|----------------------|--------------|--------------|-------------|
| CD3          | Anti-mouse         | 145-2C11             | BV421        | BD Horizon   | AB_11153670 |
| CD8          | Anti-mouse         | 53-6.7               | BUV395       | BD Horizon   | AB_2732919  |
| c-Met        | Anti-mouse         | eBiolclone7          | FITC         | Invitrogen   | AB_494112   |
| V $\beta$ 13 | Anti-mouse         | MR12-3               | APC          | Invitrogen   | AB_2573224  |
| IFN $\gamma$ | Anti-mouse         | XMG1.2               | BUV737       | BD Horizon   | AB_2870098  |
| Granzyme B   | Anti-mouse         | NGZB                 | APC ef780    | Invitrogen   | AB_2716966  |
| TNF $\alpha$ | Anti-mouse         | MP6-XT22             | PEcy7        | Invitrogen   | AB_11042728 |
| CD107a       | Anti-mouse         | 1D4B                 | BV786        | BD Horizon   | AB_2738762  |
| KLRG-1       | Anti-mouse         | 2F1                  | BV421        | BD Horizon   | AB_2737875  |
| PD-1         | Anti-mouse         | J43                  | APC ef780    | Invitrogen   | AB_2574002  |
| CTLA-4       | Anti-mouse         | UC10-4F10-11         | APC-R700     | BD Horizon   | AB_2739350  |
| CD178/FasL   | Anti-mouse         | MFL3                 | PE           | BD OptiBuild | AB_395711   |
| LAG-3        | Anti-mouse         | eBioC9B7W<br>(C9B7W) | PE           | Invitrogen   | AB_494214   |
| Tim-3        | Anti-mouse         | 5D12/TIM-3           | BV480        | BD OptiBuild | AB_2744184  |
| CD3          | Anti-human         | UCHT1                | PE-Cy7       | Biolegend    | AB_439781   |
| CD8          | Anti-human         | SK1                  | APC-Cy7      | BD Horizon   | AB_2044005  |
| c-Met        | Anti-human         | 95106                | FITC         | R&D System   | AB_1026292  |
| IFN $\gamma$ | Anti-human         | 4S.B3                | APC          | Invitrogen   | AB_469506   |
| Granzyme B   | Anti-human         | GB11                 | PE           | Invitrogen   | AB_1659718  |

**Figure S1**

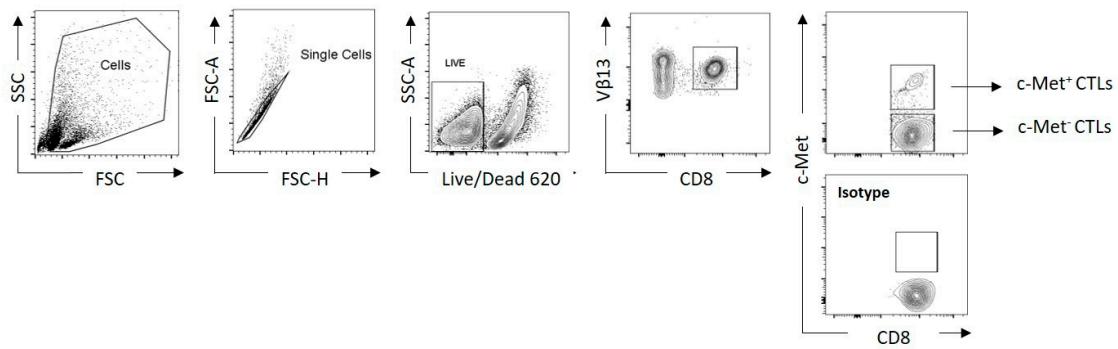

**Figure S1. Flow cytometry gating strategy for the identification of Pmel-1 CD8<sup>+</sup>Vβ13<sup>+</sup> T cells**

Live lymphocytes were first selected for their morphology using FSC/SSC parameters, followed by the exclusion of doublets and dead cells (LD620), and CD8<sup>+</sup>Vβ13<sup>+</sup> T lymphocytes were subsequently selected. c-Met expression was defined with FMO control condition.

**Figure S2**

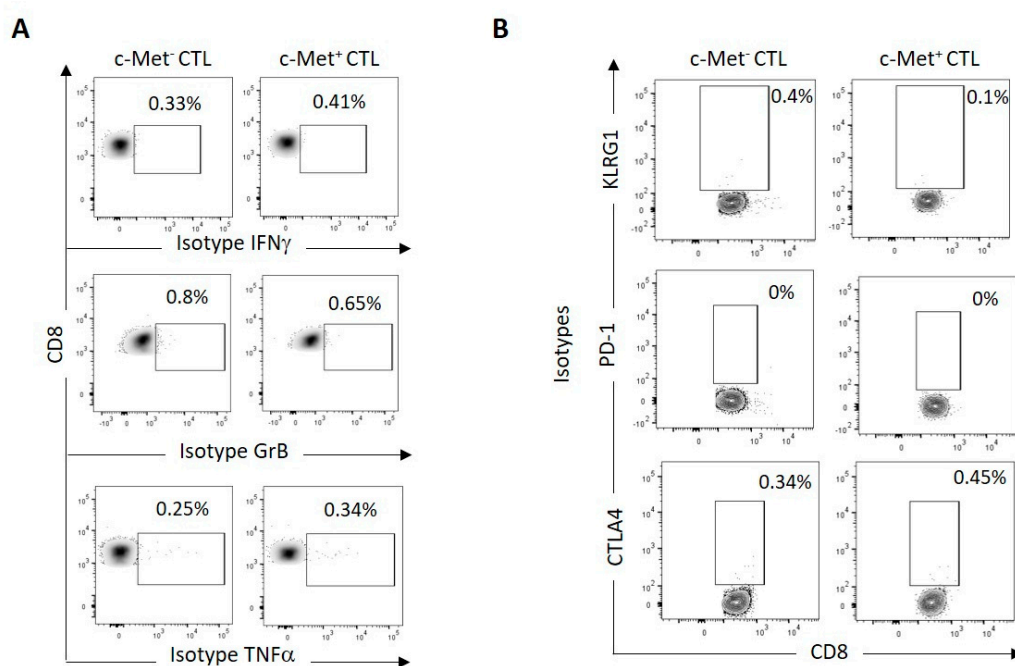

**Figure S2. Isotypes controls presentation**

Representative density (**A**) and contour plot (**B**) of isotype controls of IFN $\gamma$ , GrB and TNF $\alpha$  (**A**) and KLRG1, PD-1 and CTLA-4 (**B**).

**Figure S3**

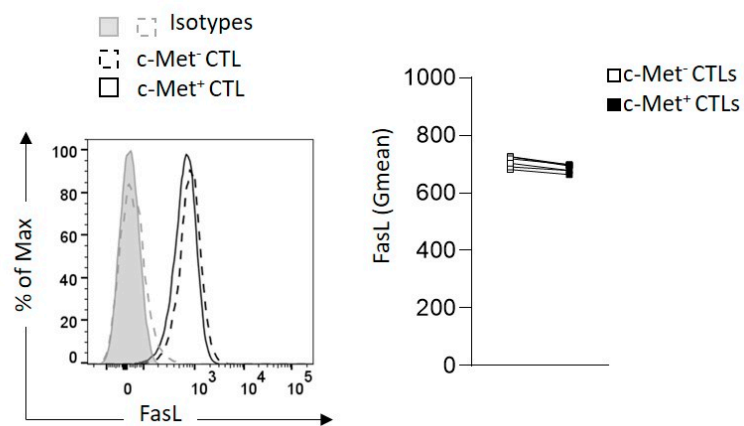

**Figure S3. FasL expression by CTLs in contact with B16 Spheroids**

Representative histogram (left panel) and paired flow cytometry quantifications (right panel) of FasL 4h after co-culture of B16 spheroids and CTLs c-Met<sup>+</sup> vs c-Met<sup>-</sup> from six experiments of (n=6 mice). P-values were calculated using a paired *t*-test.

**Figure S4**

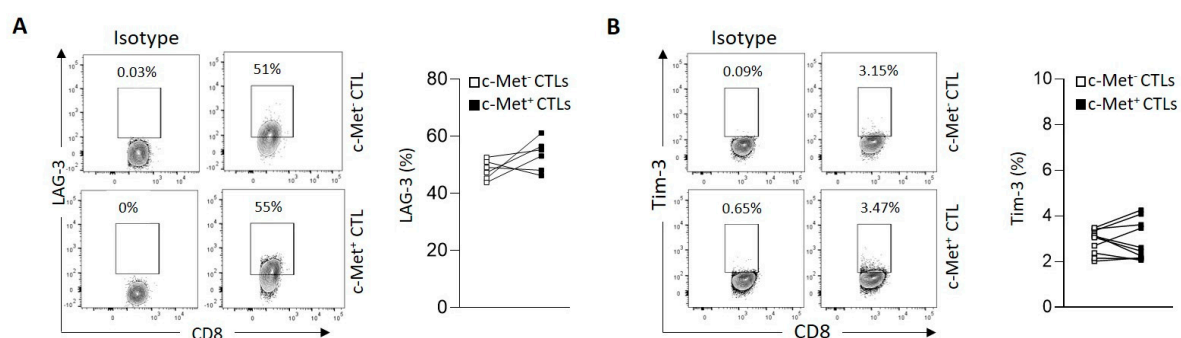

**Figure S4. LAG-3 and Tim-3 expression by CTLs in contact with B16 Spheroids**

**(A, B)** Representative contour plots (left panel) and paired flow cytometry quantifications (right panel) of LAG-3 and Tim-3 respectively 4h after co-culture of spheroids B16 and CTLs c-Met<sup>+</sup> vs c-Met<sup>-</sup> from six experiments of (n=6 mice). P-values were calculated using paired *t*-test.
